# Supplementary material for: Interplay between gonadal hormones and postnatal overfeeding in defining sex-dependent differences in gut microbiota architecture
Source: publisher site journal article supplement (doi:10.18632/aging.104140), 2020-10-27
Supplement: Supplementary file [file aging-v12i20-104140-supplementary-material-SD1.pdf]

**SUPPLEMENTARY FIGURES**

**A Sex effect on alpha diversity.**

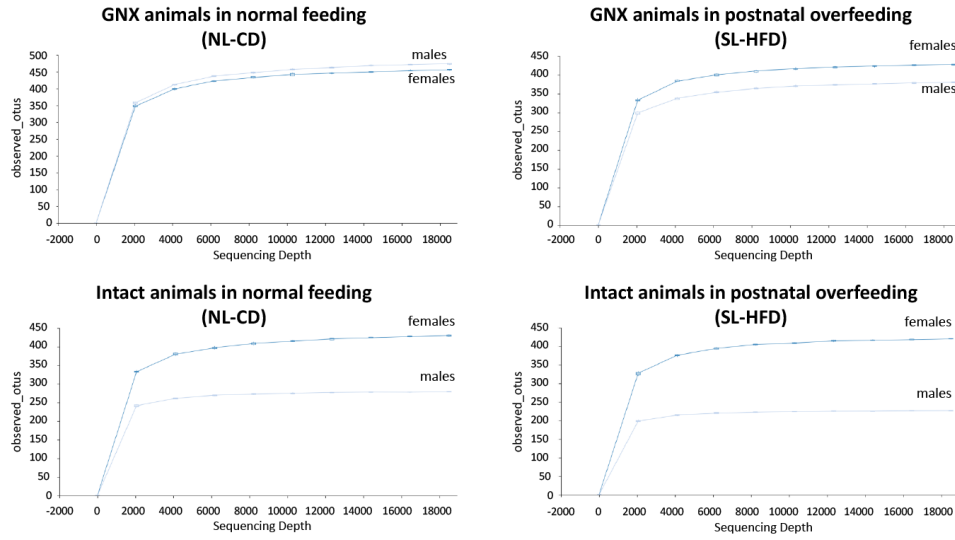

|                                                | Observed otus | Shannon      |
|------------------------------------------------|---------------|--------------|
| GNX animals in normal feeding                  | 0.495         | 0.834        |
| GNX animals in postnatal overfeeding           | 0.294         | 0.753        |
| Intact animals in normal feeding               | 0.027         | 0.016        |
| <u>Intact animals in postnatal overfeeding</u> | <u>0.021</u>  | <u>0.027</u> |

Kruskal-Wallis statistical analysis p-values.

**B Gonadectomy effect on alpha diversity.**

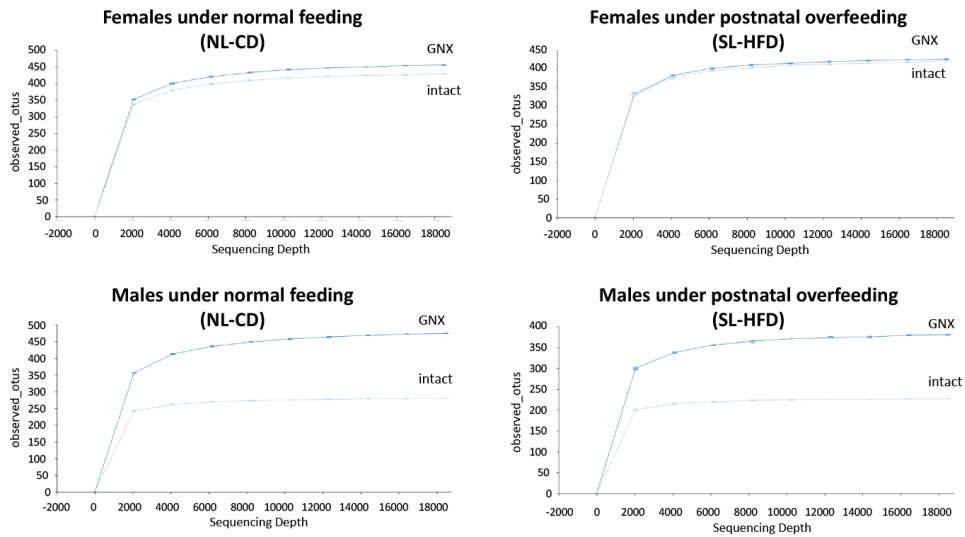

|                                          | Observed otus | Shannon      |
|------------------------------------------|---------------|--------------|
| Females under normal feeding             | 0.600         | 0.916        |
| Females under postnatal overfeeding      | 1.000         | 0.208        |
| Males under normal feeding               | 0.046         | 0.027        |
| <u>Males under postnatal overfeeding</u> | <u>0.059</u>  | <u>0.074</u> |

Kruskal-Wallis statistical analysis p-values.

**Supplementary Figure 1. Diversity indexes according to sex, gonadectomy and feeding conditions. (A) Sex effect on alpha diversity; (B) Gonadectomy effect on alpha diversity.**

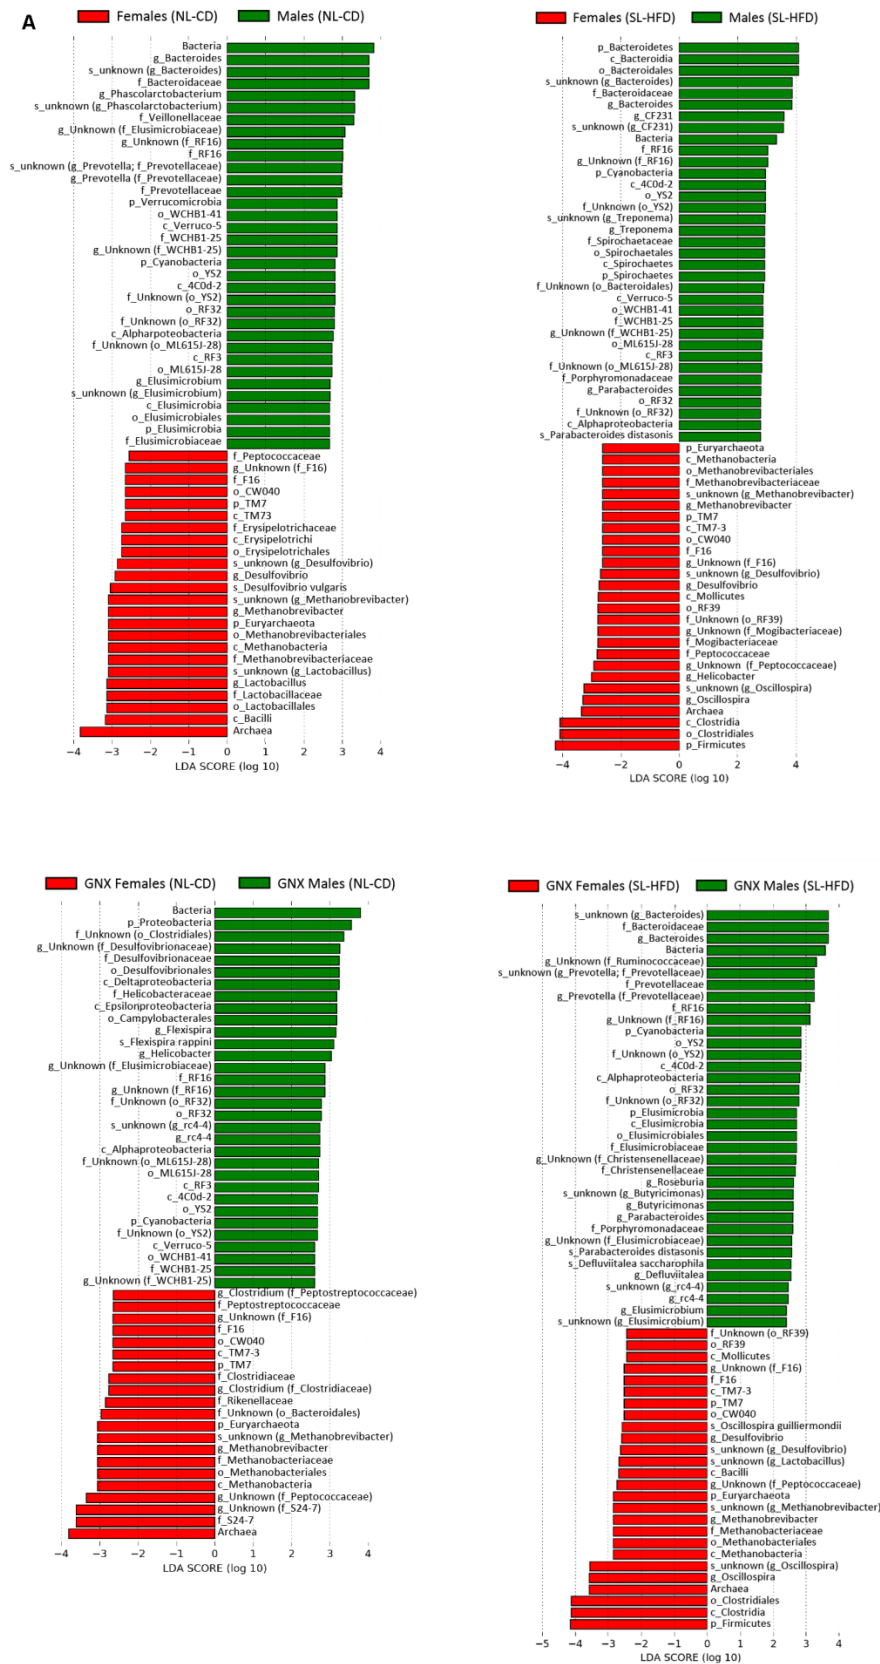

**Supplementary Figure 2.** Linear discriminant analysis (LDA) scores between sexes under normal feeding and overfeeding conditions, in intact (A) and gonadectomized (B) animals.

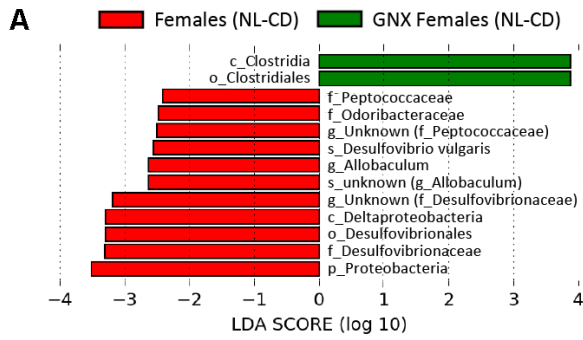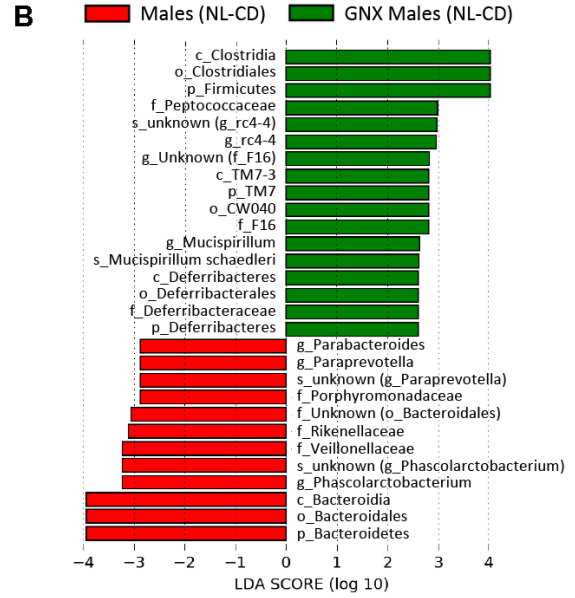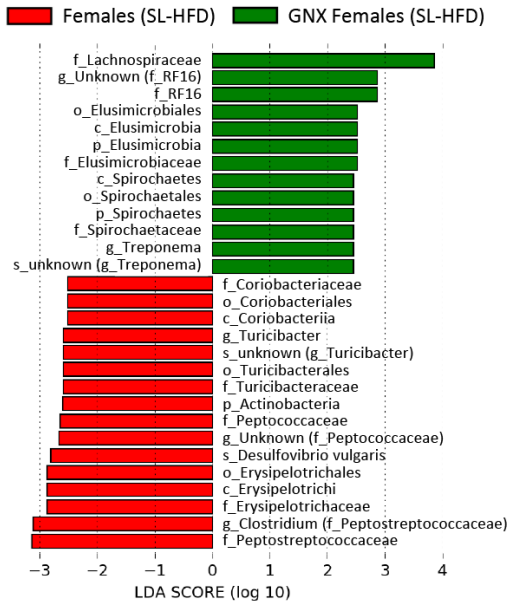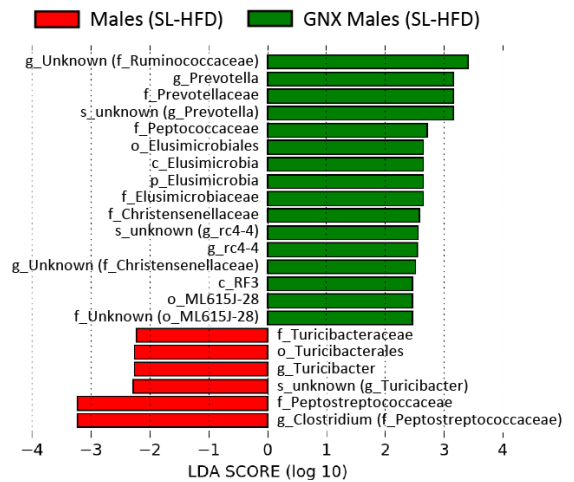

**Supplementary Figure 3.** Linear discriminant analysis (LDA) scores between intact and gonadectomized animals, under normal feeding and overfeeding conditions in females (A) and males (B).
