# Supplementary material for: Interplay between gonadal hormones and postnatal overfeeding in defining sex-dependent differences in gut microbiota architecture
Source: publisher site journal article supplement (doi:10.18632/aging.104140), 2020-10-27
Supplement: Supplementary file [file aging-v12i20-104140-supplementary-material-SD2.pdf]

## SUPPLEMENTARY TABLE

**Supplementary Table 1. Bacterial genera with different abundance between sexes in intact and gonadectomized animals.**

|                                            | <i>Normal feeding</i> |            | <i>Postnatal overfeeding</i> |            |
|--------------------------------------------|-----------------------|------------|------------------------------|------------|
|                                            | <i>non-GNX</i>        | <i>GNX</i> | <i>non-GNX</i>               | <i>GNX</i> |
| <i>Methanobrevibacter</i>                  | F                     | F          | F                            | F          |
| <i>Bacteroides</i>                         | M                     |            | M                            | M          |
| <i>Parabacteroides</i>                     |                       |            | M                            | M          |
| <i>Prevotella (Prevotellaceae)</i>         | M                     |            |                              | M          |
| <i>Unknown (f_RF16)</i>                    | M                     | M          | M                            | M          |
| <i>Unknown (f_S24-7)</i>                   |                       | F          |                              |            |
| <i>Butyricimonas</i>                       |                       |            |                              | M          |
| <i>CF231</i>                               |                       |            | M                            |            |
| <i>Unknown (Elusimicrobiaceae)</i>         | M                     | M          |                              | M          |
| <i>Elusimicrobium</i>                      | M                     |            |                              | M          |
| <i>Lactobacillus</i>                       | F                     |            |                              |            |
| <i>Unknown (Christensenellaceae)</i>       |                       |            |                              | M          |
| <i>Clostridium (Clostridiaceae)</i>        |                       | F          |                              |            |
| <i>Roseburia</i>                           |                       |            |                              | M          |
| <i>Unknown (Peptococcaceae)</i>            |                       | F          | F                            | F          |
| <i>rc4-4</i>                               |                       | M          |                              | M          |
| <i>Clostridium (Peptostreptococcaceae)</i> |                       | F          |                              |            |
| <i>Unknown (Ruminococcaceae)</i>           |                       |            |                              | M          |
| <i>Oscillospira</i>                        |                       |            | F                            | F          |
| <i>Phascolarctobacterium</i>               | M                     |            |                              |            |
| <i>Unknown (Mogibacteriaceae)</i>          |                       |            | F                            |            |
| <i>Unknown (Desulfovibrionaceae)</i>       |                       | M          |                              |            |
| <i>Desulfovibrio</i>                       | F                     |            | F                            | F          |
| <i>Flexispira</i>                          |                       | M          |                              |            |
| <i>Helicobacter</i>                        |                       | M          | F                            |            |
| <i>Treponema</i>                           |                       |            | M                            |            |
| <i>Unknown (f_F16)</i>                     | F                     | F          | F                            | F          |
| <i>Unknown (f_WCHB1-25)</i>                | M                     | M          | M                            |            |
| <i>Defluviitalea</i>                       |                       |            |                              | M          |

GNX: gonadectomized animals. Non-GNX: intact animals. M: higher abundance in males. F: higher abundance in females.
